# Supplementary material for: Haplotypes spanning centromeric regions reveal persistence of large blocks of archaic DNA
Source: PubMed Central journal article supplement (PMC6592686; doi:10.7554/elife.42989), 2019-06-25

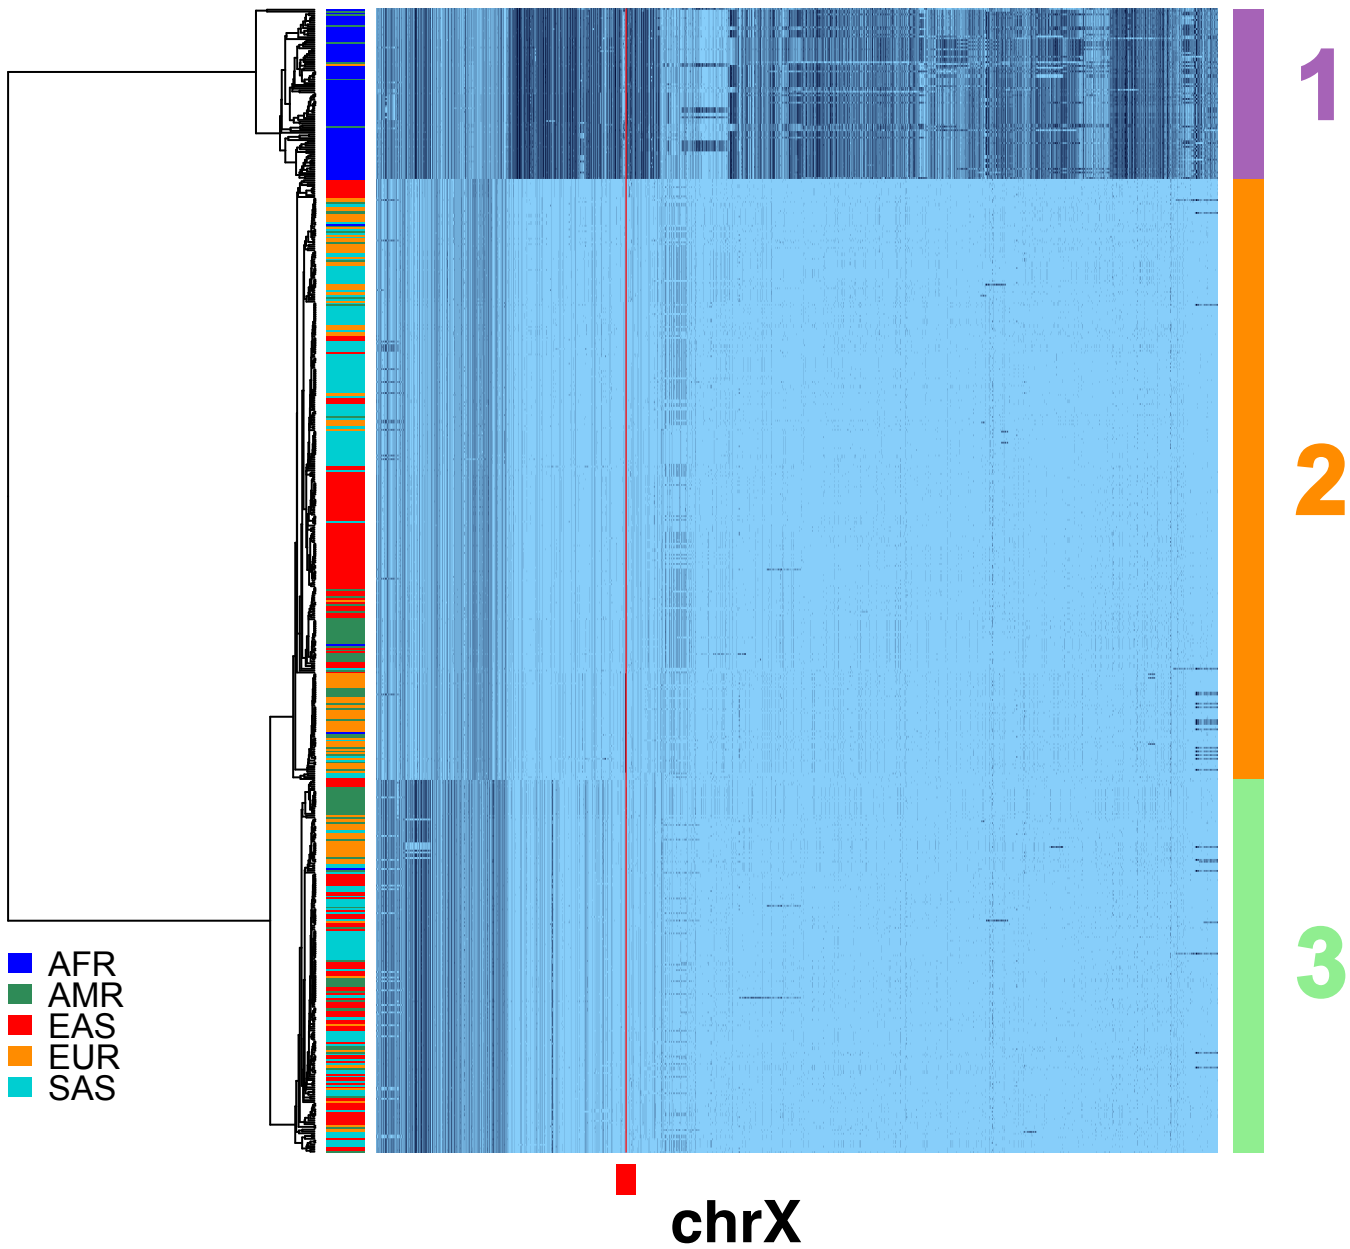

Supplement: elife-42989-fig1-figsupp2-data1.pdf [file elife-42989-fig1-figsupp2-data1.pdf]
