# Supplementary material for: Haplotypes spanning centromeric regions reveal persistence of large blocks of archaic DNA
Source: PubMed Central journal article supplement (PMC6592686; doi:10.7554/elife.42989), 2019-06-25
Supplement: elife-42989-fig3-figsupp3-data1.pdf [file elife-42989-fig3-figsupp3-data1.pdf]

AFR  
AMR  
EAS  
EUR  
SAS

$\log_2$  count

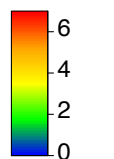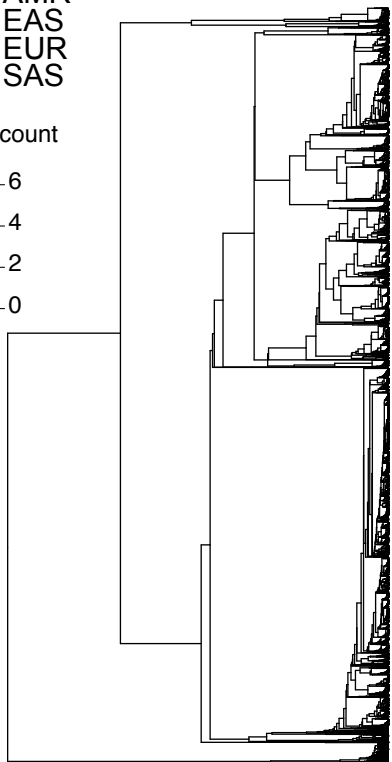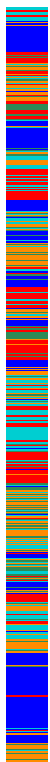

SP

NEA

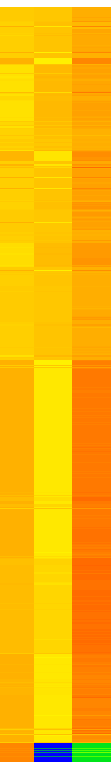

DM

DN

AN

DEN

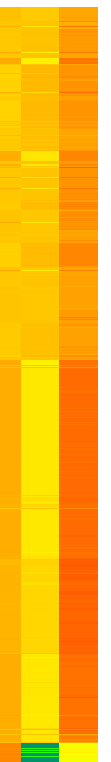

DM

DN

AN

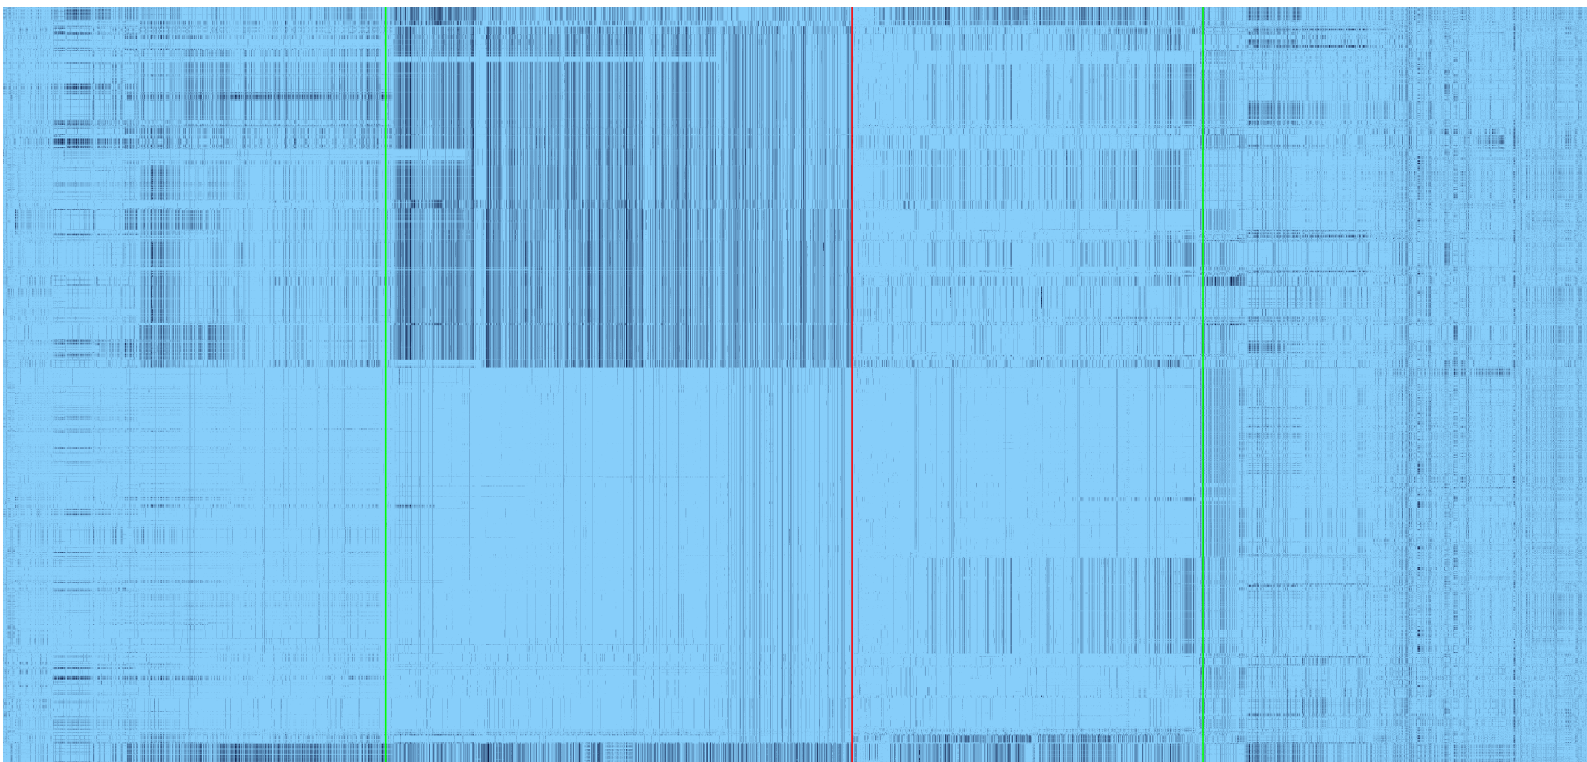

chr10
